# Supplementary material for: Impacts of environmental policy uncertainty on urban environmental pollutant emissions in China: a study based on textual analysis
Source: Frontiers journal article supplement (doi:10.3389/fenvs.2023.1203318), 2023-05-16
Supplement: Table_1.docx [file Table_1.docx]

Appendix

**Table A.1 Sources and distribution of 460 newspapers in China**

| Province | Newspaper name in Chinese | Newspaper name in English | City | Newspaper name in Chinese | Newspaper name in English | City |
| --- | --- | --- | --- | --- | --- | --- |
| Anhui | 安徽经济报 | ANHUI ECNOMIC DAILY | Hefei | 安庆日报 | ANQING DAILY | Anqing |
|  | 安徽日报 | ANHUI DAILY | Hefei | 蚌埠日报 | Bengbu Daily | Bengbu |
|  | 合肥日报 | Hefei Daily | Hefei | 巢湖日报 | CHAOHU DAILY | Suzhou |
|  | 合肥晚报 | Hefei Evening News | Hefei | 滁州日报 | CHUZHOU DAILY | Chuzhou |
|  | 江淮时报 | JIANGHUAI TIMES | Hefei | 淮南日报 | HUAI NAN RI BAO | Huainan |
|  | 马鞍山日报 | MAANSHAN DAILY | Maanshan | 黄山日报 | HUANGSHAN RIBAO | Huangshan |
|  | 芜湖日报 | WUHU DAILY | Wuhu |  |  |  |
| Beijing | 北京人才市场报 | BEIJING BUSINESS TODAY | Beijing | 中国纪检监察报 | ZHONGGUO JIJIAN JIANCHA BAO | Beijing |
|  | 北京日报 | BEIJING DAILY | Beijing | 中国教师报 | CHINA TEACHER PAPER | Beijing |
|  | 北京商报 | BEIJING BUSINESS TODAY | Beijing | 中国教育报 | ZHONGGUO JIAOYU BAO | Beijing |
|  | 北京社区报 | BEIJING COMMUNITY NEWS | Beijing | 中国经济导报 | China Economic Herald | Beijing |
|  | 财会信报 | ACCOUNTING MESSENGER | Beijing | 中国经济时报 | CHINA ECONOMIC TIMES | Beijing |
|  | 财经时报 | China Business Post | Beijing | 中国经营报 | CHINA BUSINESS JOURNAL | Beijing |
|  | 电脑商报 | Computer Partner World | Beijing | 中国劳动保障报 | CHINA LABOUR AND SOCIAL SECURITY NEWS | Beijing |
|  | 法制日报 | LEGAL DAILY | Beijing | 中国老年报 | China Aged News | Beijing |
|  | 公益时报 | CHINA PHILANTHROPY TIMES | Beijing | 中国联合商报 | China United Business News | Beijing |
|  | 光明日报 | GUANGMING DAILY | Beijing | 中国旅游报 | CHINA TOURISM NEWS | Beijing |
|  | 国际商报 | INTERNATIONAL BUSINESS DAILY | Beijing | 中国绿色时报 | CHINA GREED TIMES | Beijing |
|  | 华夏时报 | CHINA TIMES | Beijing | 中国贸易报 | CHINA TRADE NEWS | Beijing |
|  | 机电商报 | Machinery & Electronics Business | Beijing | 中国能源报 | CHINA ENERGY NEWS | Beijing |
|  | 检察日报 | PROCURATORATE DAILY | Beijing | 中国农村信用合作报 | THE CREDIT COOPERATIVE | Beijing |
|  | 解放军报 | JIEFANGJUN BAO | Beijing | 中国企业报 | CHINA ENTERPRISE NEWS | Beijing |
|  | 金融时报 | FINANCIAL NEWS | Beijing | 中国人口报 | CHINA POPULATION NEWS | Beijing |
|  | 经济参考报 | ECONIMIC INFORMAITION DAILY | Beijing | 中国商报 | CHINA BUSINESS HERALD | Beijing |
|  | 经济日报 | ECONOMIC DAILY | Beijing | 中国社会报 | CHINA SOCIETY NEWS | Beijing |
|  | 农村金融时报 | Rural Financial Times | Beijing | 中国社会科学报 | CHINESE SOCIAL SCIENCES TODAY | Beijing |
|  | 人民日报 | PEOPLE'S DAILY | Beijing | 中国审计报 | ZHONGGUO SHENJI BAO | Beijing |
|  | 人民日报海外版 | PEOPLE'S DAILY OVERSEAS EDITION | Beijing | 中国税务报 | CHINA TAXATION NEWS | Beijing |
|  | 人民政协报 | RENMIN ZHENGXIE BAO | Beijing | 中国特产报 | ZHONG GUO TE CHAN BAO | Beijing |
|  | 商务时报 | Commercial Times | Beijing | 中国体育报 | CHINA SPORTS DAILY | Beijing |
|  | 世界报 | WORLD NEWS | Beijing | 中国县域经济报 | CHINA COUNTY TIMES | Beijing |
|  | 团结报北京 | TUANJIE BAO | Beijing | 中国消费者报 | CHINA CONSUMER JOURNAL | Beijing |
|  | 西部时报 | WEST TIMES | Beijing | 中国信息报 | CHINA INFORMATION NEWS | Beijing |
|  | 消费日报 | CONSUMPTION DAILY | Beijing | 中国邮政报 | CHINA POST NEWS | Beijing |
|  | 新华每日电讯 | XINHUA DAILY TELEGERAPH | Beijing | 中国证券报 | China Securities Journal | Beijing |
|  | 新农村商报 | New Countryside Commerce | Beijing | 中国政府采购报 | CHINA GOVERNMENT PROCUREMENT NEWS | Beijing |
|  | 新清华 | TSINGHUA WEEKLY | Beijing | 中国知识产权报 | CHINA INTELLECTUAL PROPERTY NEWS | Beijing |
|  | 学习时报 | STUDY TIMES | Beijing | 中国质量报 | China Quality Daily | Beijing |
|  | 证券日报 | SECURITIES DAILY | Beijing | 中国足球报 | China Soccer | Beijing |
|  | 政府采购信息报 | GOVERNMENT PROCUREMENT NFORMATION | Beijing | 中华读书报 | CHINA READING WEEKLY | Beijing |
|  | 中国保险报 | CHINA INSURANCE NEWS | Beijing | 中华工商时报 | CHINA BUSINESS TIMES | Beijing |
|  | 中国财经报 | CHINA FINANCIAL AND ECONOMIC NEWS | Beijing | 中华合作时报 | CHINA CO-OPERATIVE TIMES | Beijing |
|  | 中国产经新闻 | CHINA INDUSTRIAL ECONOMY NEWS | Beijing | 中华新闻报 | CHINA PRESS JOURBAL | Beijing |
|  | 中国城市报 | CHINA CITY NEWS | Beijing | 中国工业报 | CHINA INDUSTRY NEWS | Beijing |
|  | 中国城乡金融报 | CHINA URBAN-RURAL FINANCIAL NEWS | Beijing | 中国国土资源报 | CHINA LAND AND RESOURCES NEWS | Beijing |
|  | 中国房地产报 | China Real Estate Business | Beijing | 中国环境报 | CHINA ENVIRONMENT NEWS | Beijing |
|  | 中国改革报 | CHINA REFORM | Beijing | 中国会计报 | China Accounting News | Beijing |
|  | 中国高新技术产业导报 | CHINA HIGH-TECH INDUSTRY HERALD | Beijing | 中国集邮报 | CHINA PHILATELY NEWS | Beijing |
|  | 中国工商报 | CHINA INDUSTRY & COMMERCE NEWS | Beijing |  |  |  |
| Fujian | 福建日报 | FUJIAN RIBAO | Fuzhou | 闽西日报 | MINXIRIBAO | Longyan |
|  | 福州日报 | FUZHOU DAILY | Fuzhou | 泉州晚报 | QUANZHOU WANBAO | Quanzhou |
|  | 湄洲日报 | MEIZHOU RIBAO | Putian | 三明日报 | SANMING RIBAO | Sanming |
|  | 闽北日报 | MINBEI DAILY | Nanping | 厦门日报 | XIAMEN DAILY | Xiamen |
|  | 闽东日报 | MINDONG DAILY | Ningde | 石狮日报 | SHISHI DAILY | Fuzhou |
|  | 闽南日报 | MINNAN RIBAO | Zhanzhou | 学知报 | XUE ZHI BAO | Xiamen |
|  | 闽商报 | MINSHANG NEWS | Fuzhou |  |  |  |
| Gansu | 白银日报 | BAIYIN RIBAO | Baiyin | 陇东报 | LONGDONG BAO | Qingyang |
|  | 定西日报 | DINGXI RIBAO | Dingxi | 陇南日报 | LONGNAN RI BAO | Longnan |
|  | 甘南日报 | GAN NAN RI BAO | Gannan Tibetan Autonomous Prefecture | 民主协商报 | MIN ZHU XIE SHANG BAO | Lanzhou |
|  | 甘肃经济日报 | GANSU ECONOMIC DALIY | Lanzhou | 民族日报 | MINZU RIBAO | Linxia Hui Autonomous Prefecture |
|  | 甘肃日报 | GANSU RIBAO | Lanzhou | 平凉日报 | PINGLIANG DAILY | Pingliang |
|  | 金昌日报 | JINCHANG RIBAO | Jinchang | 天水日报 | TIANSHUI DAILY | Tianshui |
|  | 酒泉日报 | JIUQUAN RIBAO | Jiuquan | 武威日报 | WUWEI RIBAO | Wuwei |
|  | 兰州日报 | LANZHOU RIBAO | Lanzhou | 张掖日报 | ZHANGYE DAILY | Zhangye |
| Guangdong | 21世纪经济报道 | 21st CENTURY BUSINESS HERALD | Guanzhou | 汕尾 | SHANWEI RIBAO | Shanwei |
|  | 潮州日报 | CHAOZOU DAILY | Chaozhou | 韶关日报 | SHAOGUAN DAILY | Shaoguan |
|  | 东莞日报 | DONGGUAN DAILY | Dongguan | 深圳商报 | SHENZHEN ECONOMIC DAILY | Guangzhou |
|  | 佛山日报 | FOSHAN DAILY | Foshan | 深圳特区报 | SHENZHEN SPECIAL ZONE DAILY | Shenzhen |
|  | 广州日报 | GUANGZHOU DAILY | Guanghzou | 西江日报 | XIJIANG DAILY | Zhaoqing |
|  | 惠州日报 | HUIZHOU DAILY | Huizhou | 亚太经济时报 | ASIA PACIFIC ECONOMIC TIMES | Guangzhou |
|  | 江门日报 | JIANGMEN DAILY | Jiangmen | 湛江日报 | ZHANJIANG DAILY | Zhanjiang |
|  | 梅州日报 | MEIZHOU DAILY | Meizhou | 证券时报 | Securities Times | Guangzhou |
|  | 民营经济报 | PRIVATE ECONOMY NEWS | Guangzhou | 中国基金报 | CHINAFUND | Shenzhen |
|  | 南方日报 | SOUTHERN DAILY | Guangzhou | 中山日报 | ZHONGSHAN DAILY | Zhongshan |
|  | 南方周末 | SOUTHERN WEEKLY | Guanzhou | 珠海特区报 | ZHUHAI DAILY | Zhuhai |
|  | 汕头日报 | SHANTOU RIBAO | Shantou |  |  |  |
| Guangxi | 北海日报 | BEIHAIRIBAO | Beihai | 柳州日报 | LIUZHOU RIBAO | Liuzhou |
|  | 广西日报 | Guangxi Daily | Nanning | 南宁日报 | NANZNINGZ YIZBAU | Nanning |
|  | 广西政协 | Guangxi Political Consultative Conference | Nanning | 钦州日报 | QINZHOU RIBAO | Qinzhou |
|  | 桂林日报 | GUILIN DAILY | Guilin | 玉林日报 | YULIN RIBAO | Yulin |
| Guizhou | 毕节日报 | BIJIE DAILY | Bijie | 黔西南日报 | QIAN XI NAN RI BAO | Guiyan |
|  | 贵阳日报 | GUIYANG DAILY | Guiyang | 六盘水日报 | LIU PAN SHUI RI BAO | Liupanshui |
|  | 贵州日报 | GUIZHOU DAILY | Guiyang | 黔南日报 | Qiannan Daily | Qiannan Buyi and Miao Autonomous Prefecture |
|  | 贵州政协报 | GUIZHOU ZHENGXIE BAO | Guiyang | 铜仁日报 | TONGREN DAILY | Tongren |
|  | 经济信息时报 | Economic Information Times | Guiyang | 遵义日报 | ZUNYI DAILY | Zunyi |
| Hainan | 海口晚报 | HAIKOU DAILY | Haikou | 海南日报 | HAINAN DAILY | Haikou |
|  | 海南报 | HAINAN DAILY | Haikou | 三亚日报 | SANYARIBAO | Sanya |
|  | 海南农垦报 | HAINAN NONGKEN BAO | Haikou |  |  |  |
| Hebei | 保定日报 | BAO DING RI BAO | Baoding | 廊坊日报 | LangFang Daily | Langfang |
|  | 沧州日报 | CANGZHOU DAILY | Cangzhou | 秦皇岛日报 | QINHUANGDAO NEWS | Qinhuangdao |
|  | 承德日报 | CHENGDERIBAO | Chengde | 石家庄日报 | SHIJIAZHUANG RIBAO | Shijiazhuang |
|  | 邯郸日报 | HANDAN DAILY | Handan | 石油管道报 | SHIYOU GUANDAO BAO | Shijiazhuang |
|  | 河北经济日报 | HEBEI ECONOMIC DAILY | Shijiazhuang | 唐山劳动日报 | TANGSHAN LAODONG RIBAO | Tangshan |
|  | 河北科技报 | Hebei Science and Technology News | Shijiazhuang | 现代物流报 | Modern Logistics News | Shijiazhuang |
|  | 河北农民报 | Hebei Farmers News | Shijiazhuang | 邢台日报 | XINGTAI DAILY | Xingtai |
|  | 河北日报 | HEBEI DAILY | Shijiazhuang | 张家口日报 | ZHANGJIAKOU DAILY | Zhangjiakou |
|  | 衡水日报 | HENGSHUIRIBAO | Hengshui |  |  |  |
| Henan | 安阳日报 | ANYANG RIBAO | Anyang | 河南法制报 | HENAN LEGAL DAILY | Zhengzhou |
|  | 鹤壁日报 | HEBI DAILY | Hebi | 河南科技报 | HENANKEJIBAO | Zhengzhou |
|  | 焦作日报 | JIAOZUO DAILY | Jiaozuo | 河南日报 | HENAN DAILY | Zhengzhou |
|  | 开封日报 | KAIFENG RIBAO | Kaifeng | 黄河报 | YELLOWRIVER NEWS | Zhengzhou |
|  | 洛阳日报 | LUOYANG DAILY | Luoyang | 经济视点报 | THE ECONOMIC VIEW | Zhengzhou |
|  | 平顶山日报 | PINGDINGSHAN DAILY | Pingdingshan | 粮油市场报 | GRAIN NEWS | Zhengzhou |
|  | 濮阳日报 | PUYANG RIBAO | Puyang | 期货日报 | Futures Daily | Zhengzhou |
|  | 商丘日报 | SHANGQIU DAILY | Shangqiu | 郑州日报 | ZHENGZHOU DAILY | Zhengzhou |
|  | 新乡日报 | XINXIANG RIBAO | Xinxiang | 周口日报 | ZHOUKOU RIBAO | Zhoukou |
|  | 许昌日报 | XUCHANG DAILY | Xuchang | 驻马店日报 | ZHUMADIAN DAILY | Zhumadian |
| Heilongjiang | 北大荒日报 | BEIDAHUANG DAILY | Harbin | 鸡西日报 | JIXI RIBAO | Jixi |
|  | 北方时报 | Northern Times | Harbin | 佳木斯日报 | JIAMUSI DAILY | Jiamusi |
|  | 大庆日报 | DAQING DAILY | Daqing | 牡丹江日报 | MUDANJIANG DAILY | Mudanjiang |
|  | 大兴安岭日报 | DAXINGANLING RIBAO | Da Hinggan Ling Prefecture | 齐齐哈尔日报 | QIQIHAER RIBAO | Qiqihaer |
|  | 哈尔滨日报 | Harbin Daily | Harbin | 双鸭山日报 | SHUANGYASHANRIBAO | Shuangyashan |
|  | 鹤岗日报 | Hegang Daily | Hegang | 绥化日报 | SUIHUA RIBAO | Suihua |
|  | 黑河日报 | Heihe Daily | Heihe | 伊春日报 | YICHUN RIBAO | Yichun |
|  | 黑龙江经济报 | HEILONGJIANG ECONOMIC DAILY | Harbin | 远东经贸导报 | Far East Economic and Trade Herald | Harbin |
|  | 黑龙江日报 | Heilongjiang Newspaper | Harbin | 中俄经贸时报 | Sino-Russian Economic and Trade Times | Mudanjiang |
| Hubei | 鄂州日报 | EZHOU DAILY | Ezhou | 十堰日报 | SHIYAN DAILY | Shiyan |
|  | 恩施日报 | ENSHI DAILY | Enshi | 围棋报 | GO NEWS | Wuhan |
|  | 湖北日报 | HUBEI DAILY | Wuhan | 咸宁日报 | XIANNING DAILY | Xianning |
|  | 黄冈日报 | Huanggang Daily | Huanggang | 襄阳日报 | XIANGYANG DAILY | Xiangyang |
|  | 黄石日报 | HUANGSHI DAILY | Huangshi | 孝感日报 | XIAOGAN DAILY | Xiaogan |
|  | 三峡日报 | SANXIA DAILY | Yichang | 长江日报 | CHANGJIANG RIBAO | Wuhan |
| Hunan | 常德日报 | CHANGDE RI BAO | Changed | 湘声报 | Xiang Sheng News | Changsha |
|  | 郴州日报 | CHENZHOU RIBAO | Chenzhou | 湘潭日报 | Xiangtan Daily | Xiangtan |
|  | 衡阳日报 | Hengyang Daily | Hengyang | 益阳日报 | Yiyang Daily | Yiyang |
|  | 湖南经济报 | HUNAN ECONOMIC DAILY | Changsha | 永州日报 | YONGZHOU RIBAO | Yongzhou |
|  | 湖南日报 | HUNAN RIBAO | Changsha | 岳阳日报 | YUEYANG DAILY | Yueyang |
|  | 邵阳日报 | SHAOYANG RIBAO | Shaoyang | 张家界报 | Zhangjiajie News | Zhangjiajie |
|  | 团结报湖南 | TUANJIE BAO HUNAN | Changsha | 长沙晚报 | Changsha Evening News | Changsha |
| Jilin | 吉林党校报 | JI LIN DANG XIAO BAO | Changchun | 通化日报 | TONGHUA DAILY | Tonghua |
|  | 吉林日报 | JILIN DAILY | Jilin | 协商新报 | Negotiating News | Changchun |
|  | 就业时报 | EMPLOYMENT TIMES | Changchun | 延边日报 | Yanbian Daily | Yanbian |
|  | 辽源日报 | LIAO YUAN RI BAO | Liaoyuan | 长白山日报 | CHANGBAISHAN RIBAO | Baishan |
|  | 四平日报 | SIPING RIBAO | Siping | 长春日报 | CHANGCHUN DAILY | Changchun |
| Jiangsu | 常州日报 | CHANZHOU DAILY | Changzhou | 宿迁日报 | SUQIAN DAILY | Suqian |
|  | 华东旅游报 | Tourism | Nanjing | 泰州日报 | TAIZHOU DAILY | Taizhou |
|  | 淮安日报 | HUAIAN DAILY | Huanan | 无锡日报 | WUXI DAILY | Wuxi |
|  | 江苏教育报 | JIANGSU JIAOYU BAO | Nanjing | 新华日报 | XINHUA RIBAO | Nanjing |
|  | 江苏经济报 | JIANGSU ECONOMIC NEWS | Nanjing | 徐州日报 | XUZHOU DAILY | Xuzhou |
|  | 江阴日报 | JIANGYIN DAILY | Wuxi | 盐阜大众报 | YANFU PEOPLE'S DAILY | Yancheng |
|  | 连云港日报 | LIANYUNGANG DAILY | Lianyungang | 扬州日报 | YANZHOU RIBAO | Yangzhou |
|  | 南京日报 | NANJING DAILY | Nanjing | 宜兴日报 | YiXing Daily | Nanjing |
|  | 南通日报 | Nantong Daily | Nantong | 镇江日报 | ZHENJIANG DAILY | Zhenjiang |
|  | 苏州日报 | SUZHOU DAILY | Suzhou |  |  |  |
| Jiangxi | 抚州日报 | FU ZHOU RI BAO | Fuzhou | 南昌日报 | NanChang Daily | Nancang |
|  | 赣南日报 | GANNAN DAILY | Ganzhou | 上饶日报 | SHANGRAO RIBAO | Shangrao |
|  | 光华时报 | GUANGHUA SHIBAO | Fuzhou | 新余日报 | XINYU RIBAO | Xinyu |
|  | 江西日报 | JIANGXI DAILY | Nanchang | 宜春日报 | YICHUN DAILY | Yichun |
|  | 九江日报 | JIUJIANG DAILY | Jiujiang |  |  |  |
| Liaoning | 鞍山日报 | ANSHAN DAILY | Anshan | 锦州日报 | JINZHOU DAILY | Jinzhou |
|  | 本溪日报 | BENXI DAILY | Benxi | 辽宁日报 | LIAONING DAILY | Shenyang |
|  | 朝阳日报 | CHAOYANG DAILY | Chaoyang | 盘锦日报 | PANJIN RIBAO | Panjin |
|  | 大连日报 | DALIAN DAILY | Dalian | 沈阳日报 | SHENYANG DAILY | Shenyang |
|  | 丹东日报 | DANDONG DAILY | Dandong | 铁岭日报 | TIELING RIBAO | Tieling |
|  | 抚顺日报 | FUSHUN DAILY | Fushun | 营口日报 | YINGKOURIBAO | Yingkou |
|  | 阜新日报 | FUXIN DAILY | Fuxin | 友报 | CPCC LIAONING COMMITTEE DIRECT | Shenyang |
| Inner Mongolia | 巴彦淖尔 | Bayannaoer News | Bayan Nur | 呼伦贝尔日报 | Hulunbuir Daily | Hulun Buir |
|  | 包头日报 | BAOTOU RIBAO | Baotou | 内蒙古日报 | Inner Mongolia Daily | Huhhot |
|  | 赤峰日报 | Chifeng Daily | Chifeng | 通辽日报 | Tongliao Daily | Tongliao |
|  | 鄂尔多斯日报 | Ordos Daily | Ordos | 乌海日报 | WUHAI DAILY | Wuhai |
|  | 呼和浩特日报 | Hohhot Daily | Huhhot | 锡林郭勒日报 | Xilin Gol Daily | Xilingol League |
| Ningxia | 固原日报 | Guyuan Daily | Guyuan | 吴忠日报 | Wuzhong Daily | Wuzhong |
|  | 华兴时报 | HUA XING SHI BAO | Yinchuan | 银川日报 | YINCHUAN RIBAO | Yinchuan |
|  | 宁夏日报 | NINGXIA RIBAO | Yinchuan | 银川晚报 | Yinchuan Evening News | 银川市 |
|  | 石嘴山日报 | SHIZUISHAN RIBAO | 石嘴山市 | 中卫日报 | ZHONGWEI RIBAO | Yinchuan |
| Qinghai | 柴达木日报 | Qaidam Daily | Haixi Mongolian and Tibetan Autonomous Prefecture | 祁连山报 | QILIANSHAN DAILY | Tibetan Autonomous Prefecture of Haibei |
|  | 格尔木日报 | GEERMU DAILY | Haixi Mongolian and Tibetan Autonomous Prefecture | 青海日报 | QINGHAI DAILY | Xining |
|  | 果洛报 | GUOLUO NEWS | Xining | 三江源报 | SANJIANGYUAN NEWS | Yushu Tibetan Autonomous Prefecture |
|  | 海东时报 | HAIDONG TIMES | Haidong | 西宁晚报 | XINING EVENING NEWS | Xining |
|  | 黄南报 | HUANGNAN NEWS | Tibetan Autonomous Prefecture of Huangnan |  |  |  |
| Shandong | 德州日报 | DEZHOU RIBAO | Dezhou | 青岛日报 | Qingdao Daily | Qingdao |
|  | 东营日报 | DONGYING RIBAO | Dongying | 日照日报 | RIZHAO RIBAO | Rizhao |
|  | 菏泽日报 | HEZE DAILY | Heze | 泰安日报 | TAI'AN DAILY | Taian |
|  | 济南日报 | JINAN DAILY | Jinan | 威海日报 | WEIHAI DAILY | Weihai |
|  | 济宁日报 | JINING DAILY | Jining | 潍坊日报 | WEIFANG RIBAO | Weifang |
|  | 莱芜日报 | LAIWU DAILY | Laiwu | 烟台日报 | YANTAI DAILY | Yantai |
|  | 联合日报 | Joint Daily | Jinan | 淄博日报 | ZIBO RIBAO | Zibo |
| Shanxi | 大同日报 | DATONG RIBAO | Datong | 山西日报 | SHANXI DAILY | Taiyuan |
|  | 瓜果蔬菜报 | Fruits and vegetable News | Taiyuan | 山西政协报 | SHANXI ZHENGXIE BAO | Taiyuan |
|  | 晋中日报 | JINZHONG DAILY | Jinzhong | 朔州日报 | SHUOZHOU DAILY | Shuozhou |
|  | 临汾日报 | LINFEN RIBAO | Linfen | 太行日报 | TAI HANG RI BAO | Jincheng |
|  | 吕梁日报 | LULIANG DAILY | Lvliang | 太原日报 | TAIYUAN DAILY | Taiyuan |
|  | 人民代表报 | RENMINDAIBIAOBAO | Taiyuan | 忻州日报 | XINZHOU DAILY | Xinzhou |
|  | 山西党校报 | SHANXI DANGXIAO NEWS | Taiyuan | 阳泉日报 | YANGQUAN RIBAO | Yangquan |
|  | 山西经济报 | Shanxi Economic News | Taiyuan | 运城日报 | YUNCHENG DAILY | Yuncheng |
|  | 山西青年报 | Shanxi Youth Daily | Taiyuan | 长治日报 | CHANGZHI RIBAO | Changzhi |
| Shaanxi | 安康日报 | ANKANG DAILY | Ankang | 铜川日报 | TONGCHUAN DAILY | Tongzhou |
|  | 宝鸡日报 | BAOJI DAILY | Baoji | 渭南日报 | WEINAN DAILY | Weinan |
|  | 各界导报 | GUIDE NEWS FOR ALL CIR CLES | Xi’an | 西安日报 | XI'AN DAILY | Xi’an |
|  | 汉中日报 | HANZHONG DAILY | Hanzhong | 咸阳日报 | Xianyang Daily | Xianyang |
|  | 陕西日报 | SHAANXI DAILY | Xi’an | 延安日报 | YANAN DAILY | Yanan |
|  | 商洛日报 | SHANGLUO RIBAO | Shangluo | 榆林日报 | Yulin Daily | Yulin |
| Shanghai | 第一财经日报 | China Business News | Shanghai | 人才市场报 | JOB MARKET | Shanghai |
|  | 东方城乡报 | DONGFANG CHENGXIANG BAO | Shanghai | 上海金融报 | SHANGHAI FINANCIAL NEWS | Shanghai |
|  | 房地产时报 | REAL ESTATE TIMES | Shanghai | 上海证券报 | SHANGHAI SECURITIES NEWS | Shanghai |
|  | 国际金融报 | INTERNATIONAL FINANCE NEWS | Shanghai | 社会科学报 | Social Sciences Weekly | Shanghai |
|  | 解放日报 | JIEFANG DAILY | Shanghai | 文汇报 | WENHUI DAILY | Shanghai |
|  | 联合时报 | UNITED TIMES | Shanghai |  |  |  |
| Sichuan | 阿坝日报 | ABA DAILY | Tibetan Qiang Autonomous Prefecture of Ngawa | 眉山日报 | MEISHAN DAILY | Meishan |
|  | 巴中日报 | BAZHONG DAILY | Bazhong | 绵阳日报 | MIANYANG DAILY | Mianyang |
|  | 成都日报 | CHENGDU DAILY | Chengdu | 南充日报 | NC DAILY | Nanchong |
|  | 达州日报 | DAZHOU RIBAO | Dazhou | 内江日报 | NEIJIANG RIBAO | Neijing |
|  | 甘孜日报 | GANZI DAILY | Tibetan Autonomous Prefecture of Garzê | 攀枝花日报 | PANZHIHUA DAILY | Panzhihua |
|  | 广安日报 | GUANGAN RIBAO | Guang’an | 企业家日报 | ENTREPRENEURS' DAILY | Chengsu |
|  | 广元日报 | GUANGYUAN DAILY | Guangyuan | 四川日报 | SICHUAN DAILY | Chengdu |
|  | 乐山日报 | LESHAN DAILY | Leshan | 四川政协报 | SICHUAN ZHENGXIE BAO | Bazhong |
|  | 凉山日报 | LIANGSHAN DAILY | Liangshan | 雅安日报 | YAAN DAILY | Ya'an |
|  | 泸州日报 | LUZHOU DAILY | Luzhou | 宜宾日报 | Yibin Daily | Yibin |
|  | 自贡日报 | ZIGONG RIBAO | Zigong |  |  |  |
| Tianjin | 天津教育报 | TIANJIN EDUCATION NEWS | Tianjin | 新金融观察 | INNOVATIVE FINANCE OBSERVATION | Tianjin |
|  | 天津日报 | TIANJIN DAILY | Tianjin | 中国技术市场报 | CHINA TECHNOLOGY MARKET NEWS | Tianjin |
| Tibet | 昌都报 | CHANGDU NEWS | Qamdo | 日喀则报 | Shigatse News | Shigatse |
|  | 拉萨晚报 | Lhasa Evening News | Lhasa | 山南报 | SHANNAN NEWS | Lhoka |
|  | 林芝报 | LINZHI NEWS | Nyingchi | 西藏日报 | Tibet Daily | Lhasa |
|  | 那曲报 | NAQU NEWS | Nagqu |  |  |  |
| Xinjiang | 阿克苏日报 | Aksu Daily | Aksu | 克孜勒苏报 | KEZILESU BAO | Kizilsu Kirghiz Autonomous Prefecture |
|  | 阿勒泰日报 | Altai Daily | Altay | 石河子日报 | SHIHEZI DAILY | Shihezi |
|  | 巴音郭楞日报 | Barin Guo Yu Daily | Korla | 塔城日报 | TACHENG DAILY | Tacheng |
|  | 兵团日报 | Bingtuan Daily | Urumqi | 吐鲁番日报 | Turpan Daily | Turpan |
|  | 博尔塔拉报 | Boretala Daily | Bortala Mongol Autonomous Prefecture | 乌鲁木齐晚报 | WULUMUQI EVENING NEWS | Urumqi |
|  | 昌吉日报 | Changji Daily | Changji | 新疆日报 | XINJIANG DAILY | Urumqi |
|  | 哈密日报 | Hami Daily | Hami | 亚洲中心时报 | Asian Central Times | Urumqi |
|  | 和田日报 | Hetian Daily | Hetian | 伊犁日报 | YILI RIBAO | Ili Kazak Autonomous Prefecture |
|  | 喀什日报 | Kashi Daily | Qeshqer Shehiri |  |  |  |
| Yunnan | 楚雄日报 | CHUXIONG DAILY | Chuxiong | 玉溪日报 | YUXI RIBAO | Yuxi |
|  | 大理日报 | DALI DAILY | Dali | 云南经济日报 | YUNNAN ECONOMIC DAILY | Kunming |
|  | 红河日报 | HAOQHOQ SSIIQBAOF | Hani-Yi Autonomous Prefecture of Honghe | 云南日报 | YUNNAN DAILY | Kunming |
|  | 昆明日报 | KUNMING DAILY | Kunming | 云南政协报 | YUNNAN ZHENGXIE BAO | Kunming |
|  | 普洱日报 | PUER DAILY | Kunming |  |  |  |
| Zhejiang | 杭州日报 | HANGZHOU DAILY | Hangzhou | 衢州日报 | QUZHOU DAILY | Quzhou |
|  | 湖州日报 | HUZHOU DAILY | Huzhou | 绍兴日报 | SHAOXING DAILY | Shaoxing |
|  | 嘉兴日报 | JIAXING DAILY | Jiaxing | 台州日报 | TAIZHOU DAILY | Taizhou |
|  | 江南游报 | JIANGNAN TOURISM NEWS | Hangzhou | 温州日报 | WENZHOU DAILY | Wenzhou |
|  | 金华日报 | JINHUA DAILY | Jinhua | 浙江日报 | ZHEJIANG DAILY | Hangzhou |
|  | 丽水日报 | LISHUI DAILY | Lishui | 舟山日报 | ZHOUSHAN DAILY | Zhoushan |
|  | 宁波日报 | NIBGBO DAILY | Ningbo |  |  |  |
| Chongqing | 重庆日报 | CHONGQING DAILY | Chongqing | 重庆政协报 | Chongqing Zhengxie Bao | Chongqing |
|  | 重庆商报 | CHONGQING ECONOMIC TIMES | Chongqing |  |  |  |
